# Supplementary material for: Structural diversity in binary superlattices from Au and γ-Fe2O3 nanocrystals: towards fine tuning of dipolar interactions
Source: Royal Society of Chemistry journal article supplement (doi:10.1039/d2qm00139j), 2022-01-01
Supplement: d2qm00139j1.pdf [file d2qm00139j1.pdf]

# Structural diversity in binary superlattices from Au and $\gamma$ -Fe<sub>2</sub>O<sub>3</sub> nanocrystals: towards fine tuning of dipolar interactions

Suyeon Lee<sup>1</sup>, Anh-Tu Ngo<sup>1</sup>, Isabelle Lisiecki<sup>1\*</sup> and Alexa Courty<sup>1\*</sup>

*I-Sorbonne Université, MONARIS, UMR8233, UMR 8233, F-75005 Paris, France*

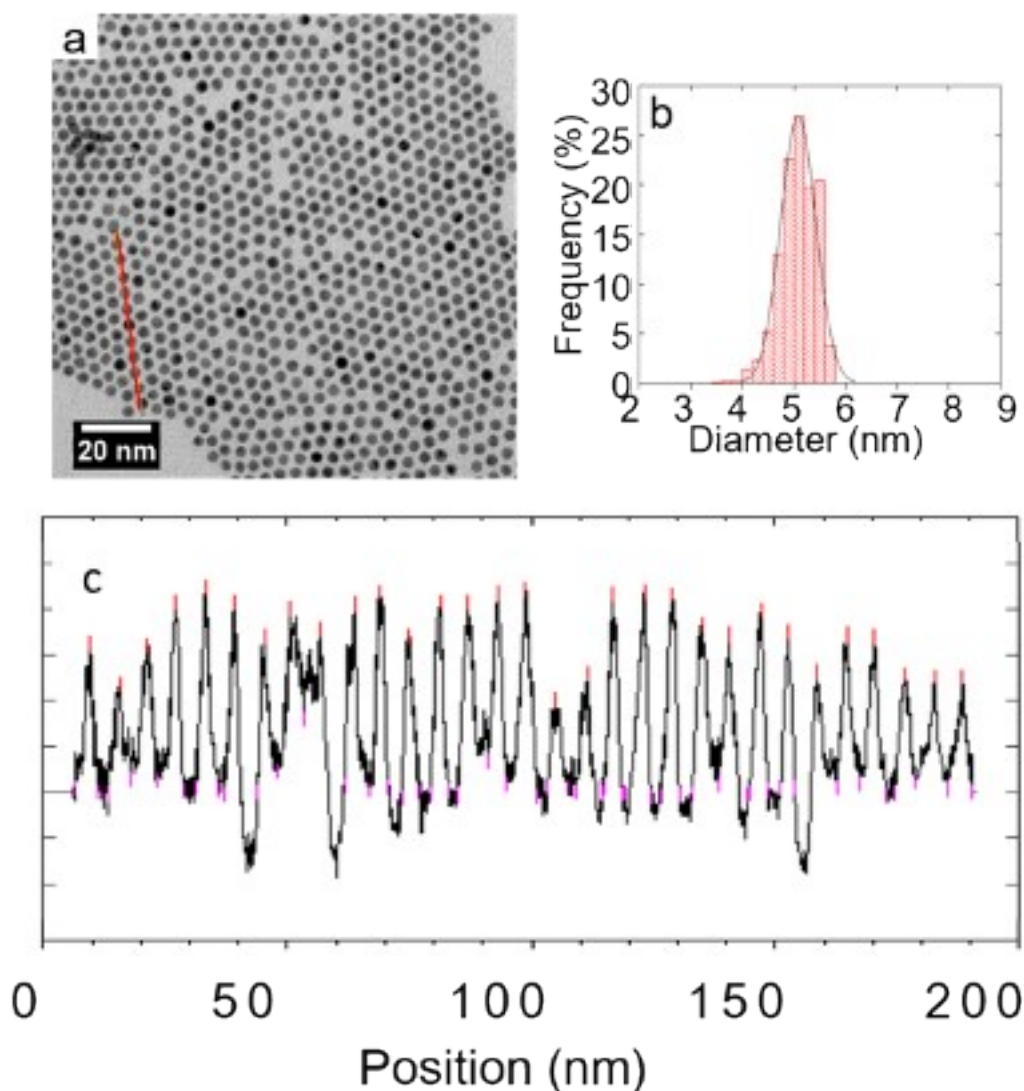

Figure S1. a) TEM image of  $4.6 \pm 0.3$  nm Au NPs , b) corresponding size distribution and c) contrast profile made over the red line allowing to determine the effective diameter  $D_{C-C} \approx 6.4$  nm.

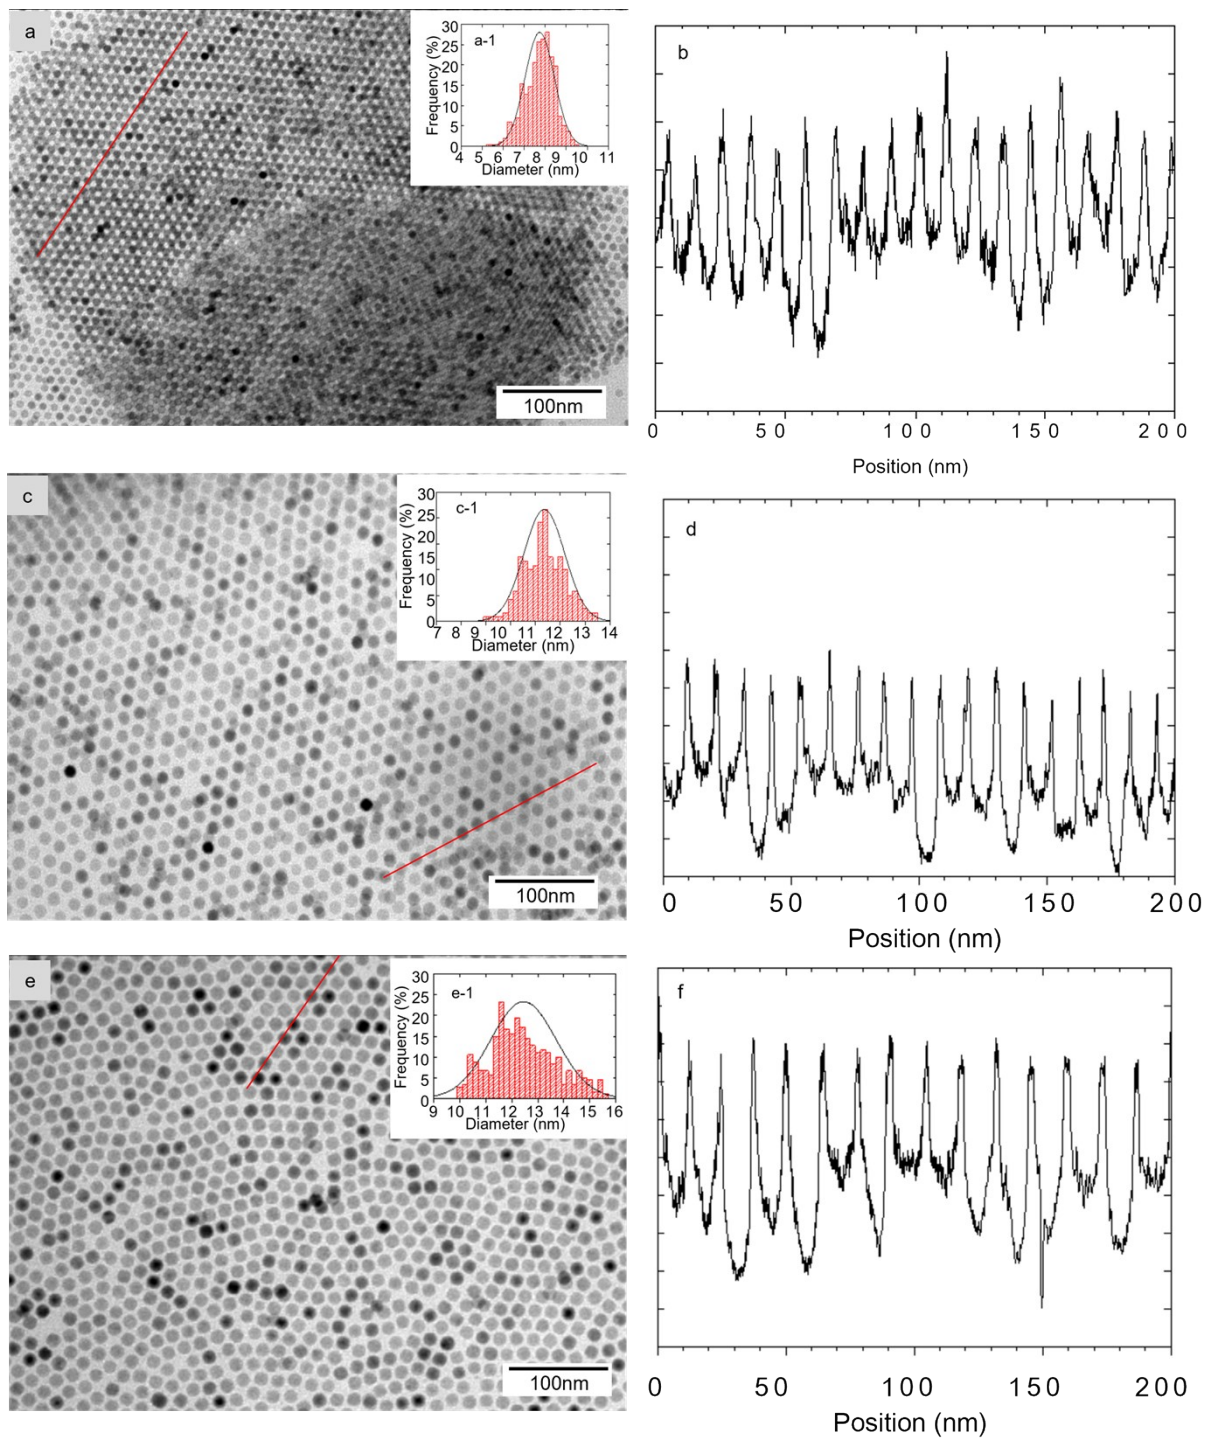

Figure S2. TEM images of  $\gamma\text{-Fe}_2\text{O}_3$  NPs of different diameters and contrast profiles made over the red lines, allowing the determination of corresponding effective diameters  $D_{C-C}$  : a)  $D = 7.9 \pm 0.6$  nm b)  $D_{C-C} \approx 10$  nm c)  $D = 11.4 \pm 0.9$  nm d)  $D_{C-C} \approx 13.4$  nm e)  $D = 12.4 \pm 1.0$  nm f)  $D_{C-C} \approx 14.2$  nm.

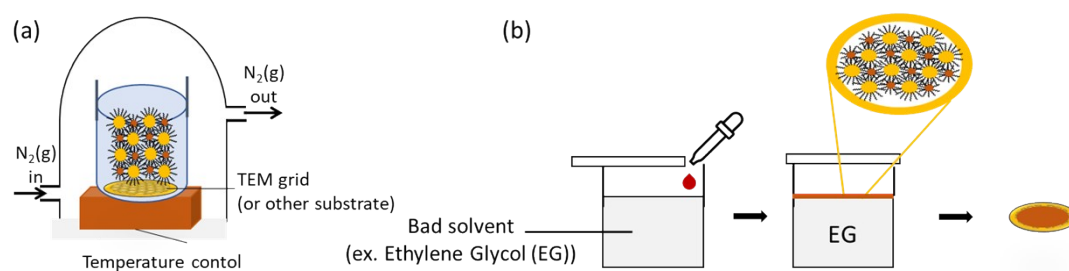

*Figure S3: Schemes of preparation methods used for growing ordered binary superlattices.*

*Table S1 Hildebrand parameters and boiling points of the different solvents used in this study<sup>29–31</sup>.*

| Solvent or (ligands) | Hildebrand solubility parameters (MPa <sup>0.5</sup> ) | Dielectric constant | Boiling point (°C) | Evaporation time (hour) |
|----------------------|--------------------------------------------------------|---------------------|--------------------|-------------------------|
| Toluene              | 18.2                                                   | 2.38                | 111                | 4                       |
| Cumene               | 17.5                                                   | 2.4                 | 152                | 5                       |
| Hexane               | 14.9                                                   | 1.8                 | 68                 | 0.5                     |

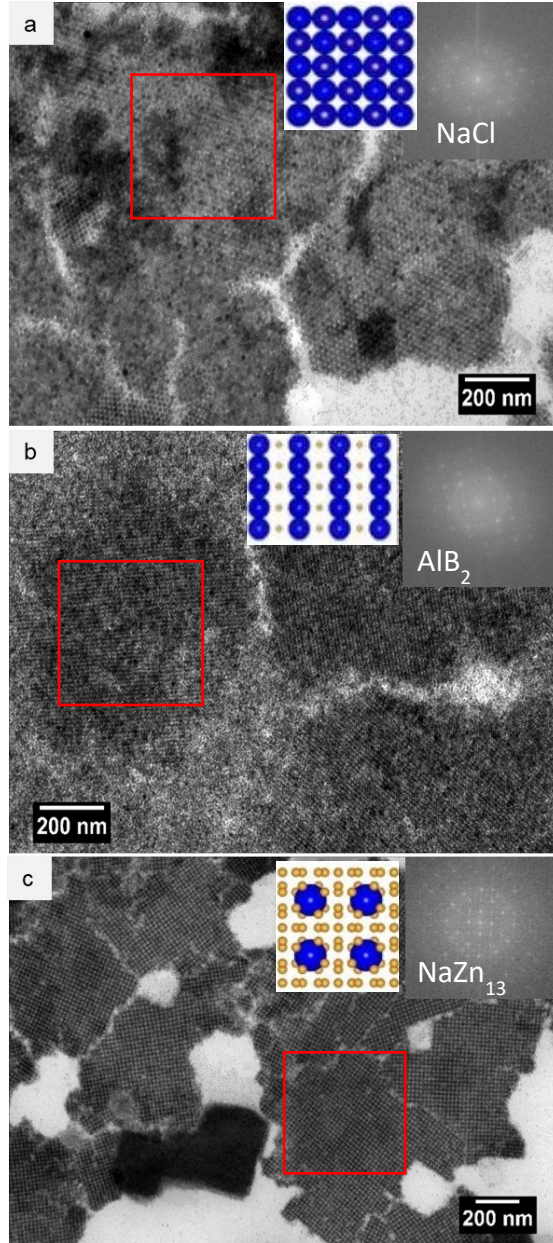

Figure S4. TEM images of BNSLs composed of  $\gamma\text{-Fe}_2\text{O}_3$  and Au NPs, with different effective size ratios ( $V_{\text{eff}}$ ), keeping the other conditions unchanged ( $[\gamma\text{-Fe}_2\text{O}_3]/[\text{Au}]=1/4$ ,  $T_d=50^\circ\text{C}$ ),  $V_{\text{eff}} = (a) 0.45 (b) 0.48 (c) 0.64$ . Insets: the FFT analysis performed on selected areas (red squares) of the binary superlattices and BNSL structures corresponding to TEM images.

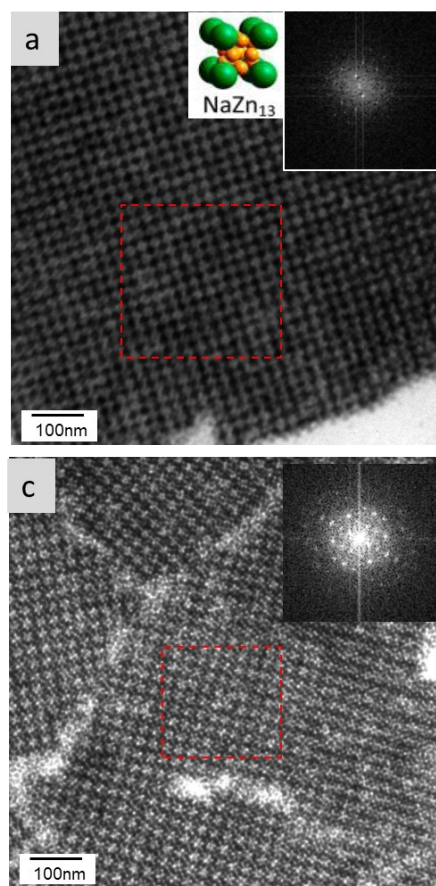

Figure S5. TEM images of  $\text{NaZn}_{13}$  type binary superlattices formed with 7.9nm  $\gamma\text{-Fe}_2\text{O}_3$  and 4.6nm Au NPs with fixed effective size ratio ( $\gamma_{\text{eff}}=0.64$ ) and deposition temperature  $T_d=50^\circ\text{C}$  by using different solvents a) toluene and b) cumene. Insets: the FFT analysis performed on selected areas (red squares) of the binary superlattices and representation of unit cell of  $\text{NaZn}_{13}$  type binary structure.

Table S2. Interparticle distance  $D_{C-C}$  between magnetic NPs ( $\gamma\text{-Fe}_2\text{O}_3$  NPs) in thin BNSLs and pure  $\gamma\text{-Fe}_2\text{O}_3$  NP assemblies.

|                          | Binary superlattices<br>formed with 7.9 nm $\gamma\text{-Fe}_2\text{O}_3$ and 4.6 nm<br>Au NPs | Pure 7.9 nm $\gamma\text{-Fe}_2\text{O}_3$ NP<br>superlattices |
|--------------------------|------------------------------------------------------------------------------------------------|----------------------------------------------------------------|
| $D_{C-C}$                | 13.8 nm                                                                                        | 10 nm                                                          |
| Crystalline<br>structure | $\text{NaZn}_{13}$                                                                             | $fcc$                                                          |

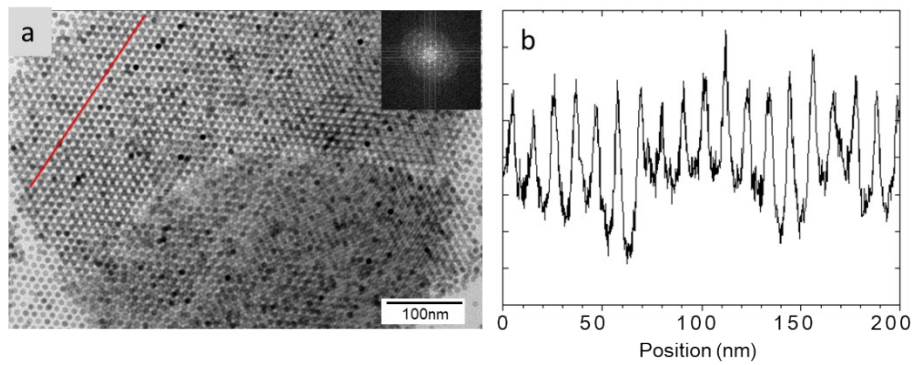

Figure S6. (a) TEM image of thin layers of  $\gamma\text{-Fe}_2\text{O}_3$  NPs with their FFT image (inset) and (b) the contrast profile made over the red line, indicating an interparticle distances  $D_{C-C} \approx 10$  nm.

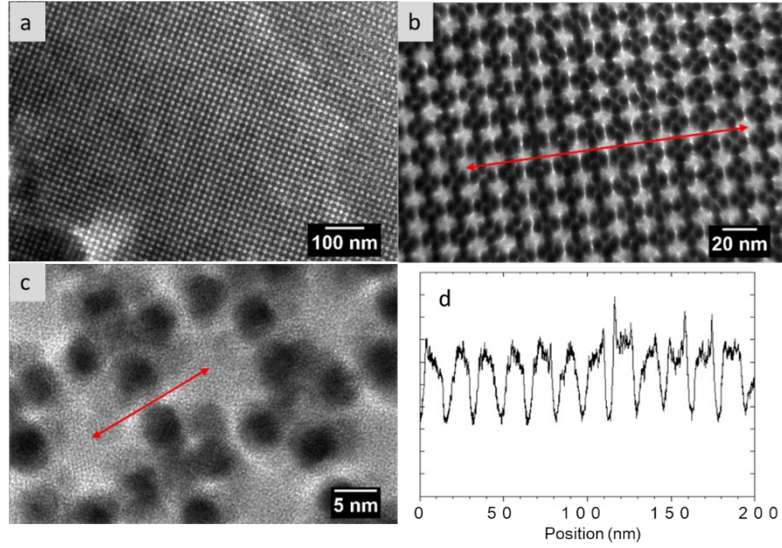

Figure S7. (a-c) HR-TEM images of  $\text{NaZn}_{13}$  BNSL structure at different magnifications and (d) the contrast profile made over the red line, from (b) indicating an interparticle distances  $D_{C_c} \approx 13.8$  nm.

Table S3. Comparison of the blocking temperature and the coercivity values obtained by SQUID measurements for pure  $\gamma\text{-Fe}_2\text{O}_3$  superlattices and  $\gamma\text{-Fe}_2\text{O}_3$ -Au BNSLs. All values are deduced from Figure 6.

|                                              | SQUID                           |                        |
|----------------------------------------------|---------------------------------|------------------------|
|                                              | Blocking temperature, $T_b$ (K) | Coercivity, $H_c$ (Oe) |
| $\gamma\text{-Fe}_2\text{O}_3$ superlattices | 84                              | 360                    |
| $\gamma\text{-Fe}_2\text{O}_3$ -Au BNSLs     | 76                              | 360                    |
